# Supplementary material for: Identifying and characterizing SCRaMbLEd synthetic yeast using ReSCuES
Source: PubMed Central journal article supplement (PMC5964233; doi:10.1038/s41467-017-00806-y), 2018-05-22
Supplement: 41467_2017_806_MOESM3_ESM.pdf [file 41467_2017_806_MOESM3_ESM.pdf]

## **Description of Additional Supplementary Files**

### **File Name: Supplementary Data 1**

Description: PCR analysis of 91 chromosome XII loci

### **File Name: Supplementary Data 2**

Description: Sequencing results summary and gene annotations for JDY506-JDY510

### **File Name: Supplementary Data 3**

Description: Primers and plasmids used in this study

### **File Name: Supplementary Data 4**

Description: Strains used in this paper
